# Supplementary material
Source: PubMed Central journal article supplement (PMC6727376)
Supplement: am9b03442_si_001.pdf [file am9b03442_si_001.pdf]

## Surface engineered biomimetic inks based on UV cross-linkable wood biopolymers for 3D printing

Wenyang Xu <sup>a</sup>, Xue Zhang <sup>b,†</sup>, Peiru Yang <sup>c,†</sup>, Otto Långvik <sup>d</sup>, Xiaoju Wang <sup>a,\*</sup>, Yongchao Zhang <sup>a</sup>, Fang Cheng <sup>c,e</sup>, Monika Österberg <sup>b</sup>, Stefan Willför <sup>a</sup>, Chunlin Xu <sup>a,f,\*</sup>

<sup>a</sup> Laboratory of Wood and Paper Chemistry, Johan Gadolin Process Chemistry Centre, Åbo Akademi University, Porthansgatan 3, 20500 Turku, Finland

<sup>b</sup> Department of Bioproducts and Biosystems, School of Chemical Technology, Aalto University, FI-00076 Espoo, Finland

<sup>c</sup> Cell Biology, Faculty of Science and Engineering, Åbo Akademi University, Tykistökatu 6, 20520, Turku, Finland.

<sup>d</sup> Laboratory of Organic Chemistry, Johan Gadolin Process Chemistry Centre, Åbo Akademi University, Biskopsgatan 8, 20500 Turku, Finland

<sup>e</sup> School of Pharmaceutical Sciences (Shenzhen), Sun Yat-sen University, 510006 Guangzhou, China.

<sup>f</sup> Kemira Oyj, Espoo FI-02270, Finland

\* X. Wang: Xiaoju.Wang@abo.fi and C. Xu: Chunlin.Xu@abo.fi

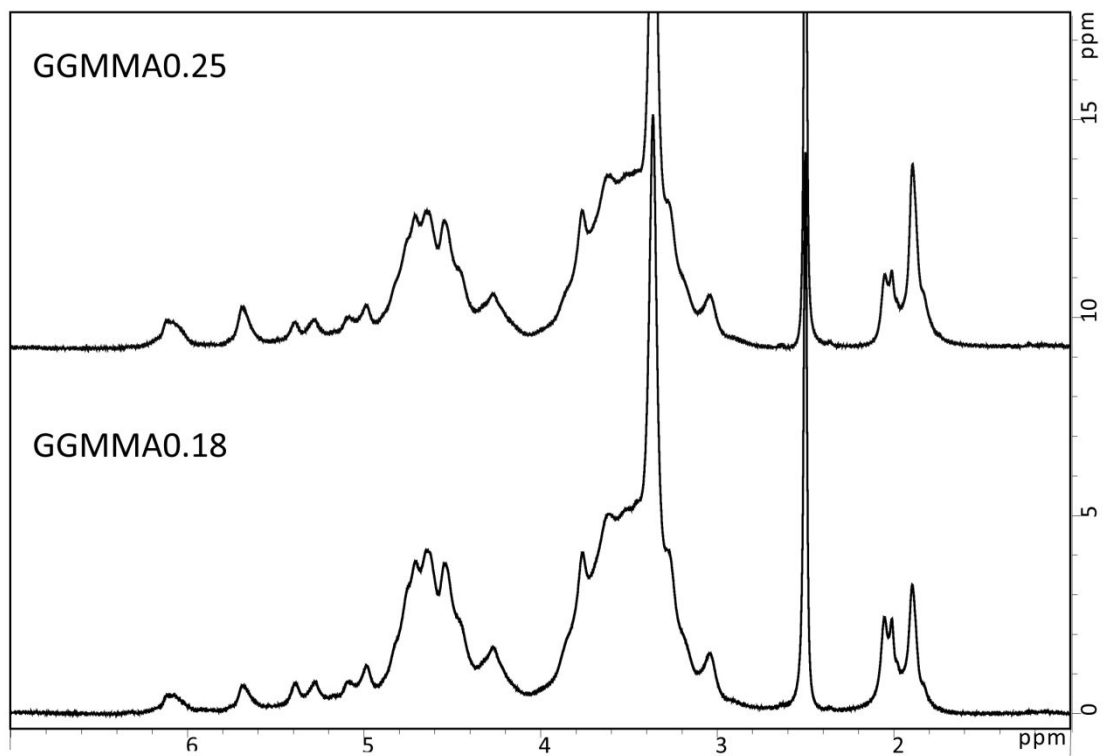

Figure S1. <sup>1</sup>H NMR spectra of GGMA0.18 and GGMA0.25 dissolved in DMSO-*d*<sub>6</sub>.

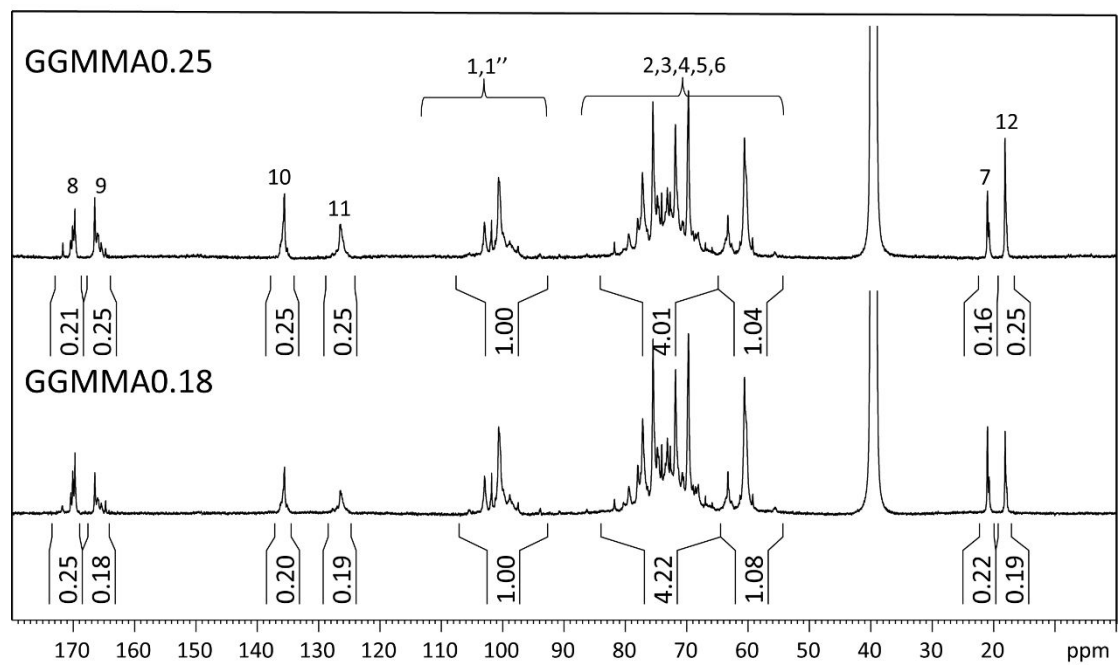

Figure S2. Quantitative <sup>13</sup>C NMR spectra of GGMAA0.18 and GGMAA0.25 dissolved in DMSO-d<sub>6</sub>.

Supporting information

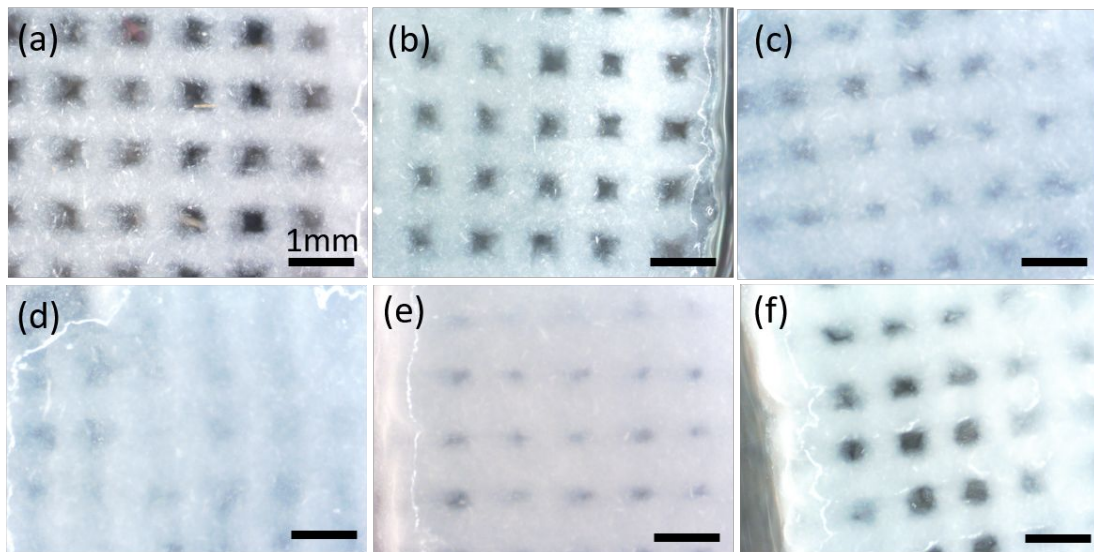

Figure S3. Images of the printed scaffold with dimensions of 10mm\*10mm\*2mm by inks of CNF (a), IA (b), IB (c), IC (d), IIC (e), and IIIB (f), respectively.

## Supporting information

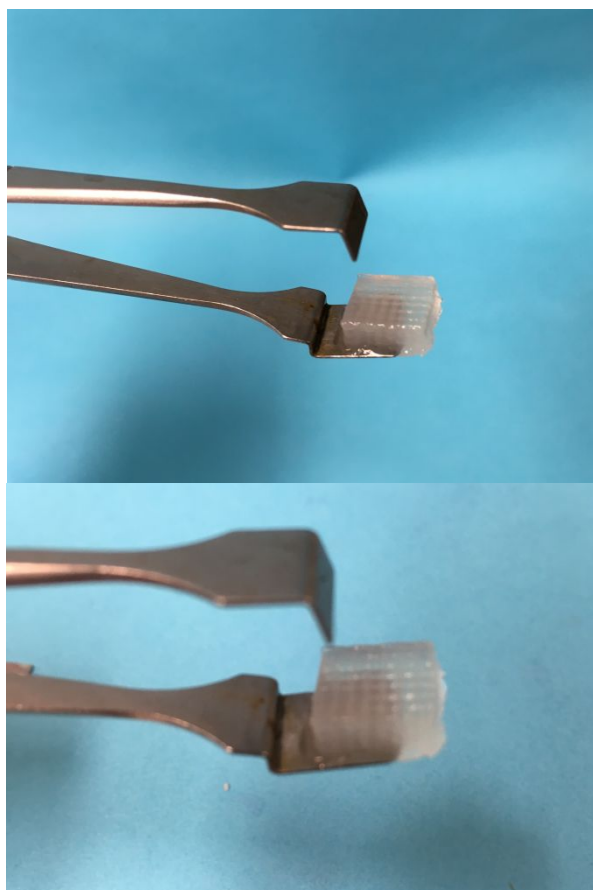

Figure S4. Images of the printed scaffold with dimensions of 10mm\*10mm\*4mm using ink IA

Table S1. Chemical composition analyzed by gas chromatography.

| Sugar unit | Ara   | Xyl   | Rha  | GlcA | GalA  | Man    | Gal   | Glc    |
|------------|-------|-------|------|------|-------|--------|-------|--------|
| GGM        | 12.05 | 74.99 | 5.00 | 1.89 | 58.19 | 577.22 | 74.54 | 143.81 |

Note: Ara stands for arabinose, Xyl for xylose, Rha for rhamnose, GlcA for glucuronic acid, GalA for galacturonic acid, Man for mannose, Gal for galactose, Glc for Glucose
